# Supplementary material
Source: PubMed Central journal article supplement (PMC3838640)
Supplement: NIHMS525228-supplement-01.pdf [file NIHMS525228-supplement-01.pdf]

Figure S1

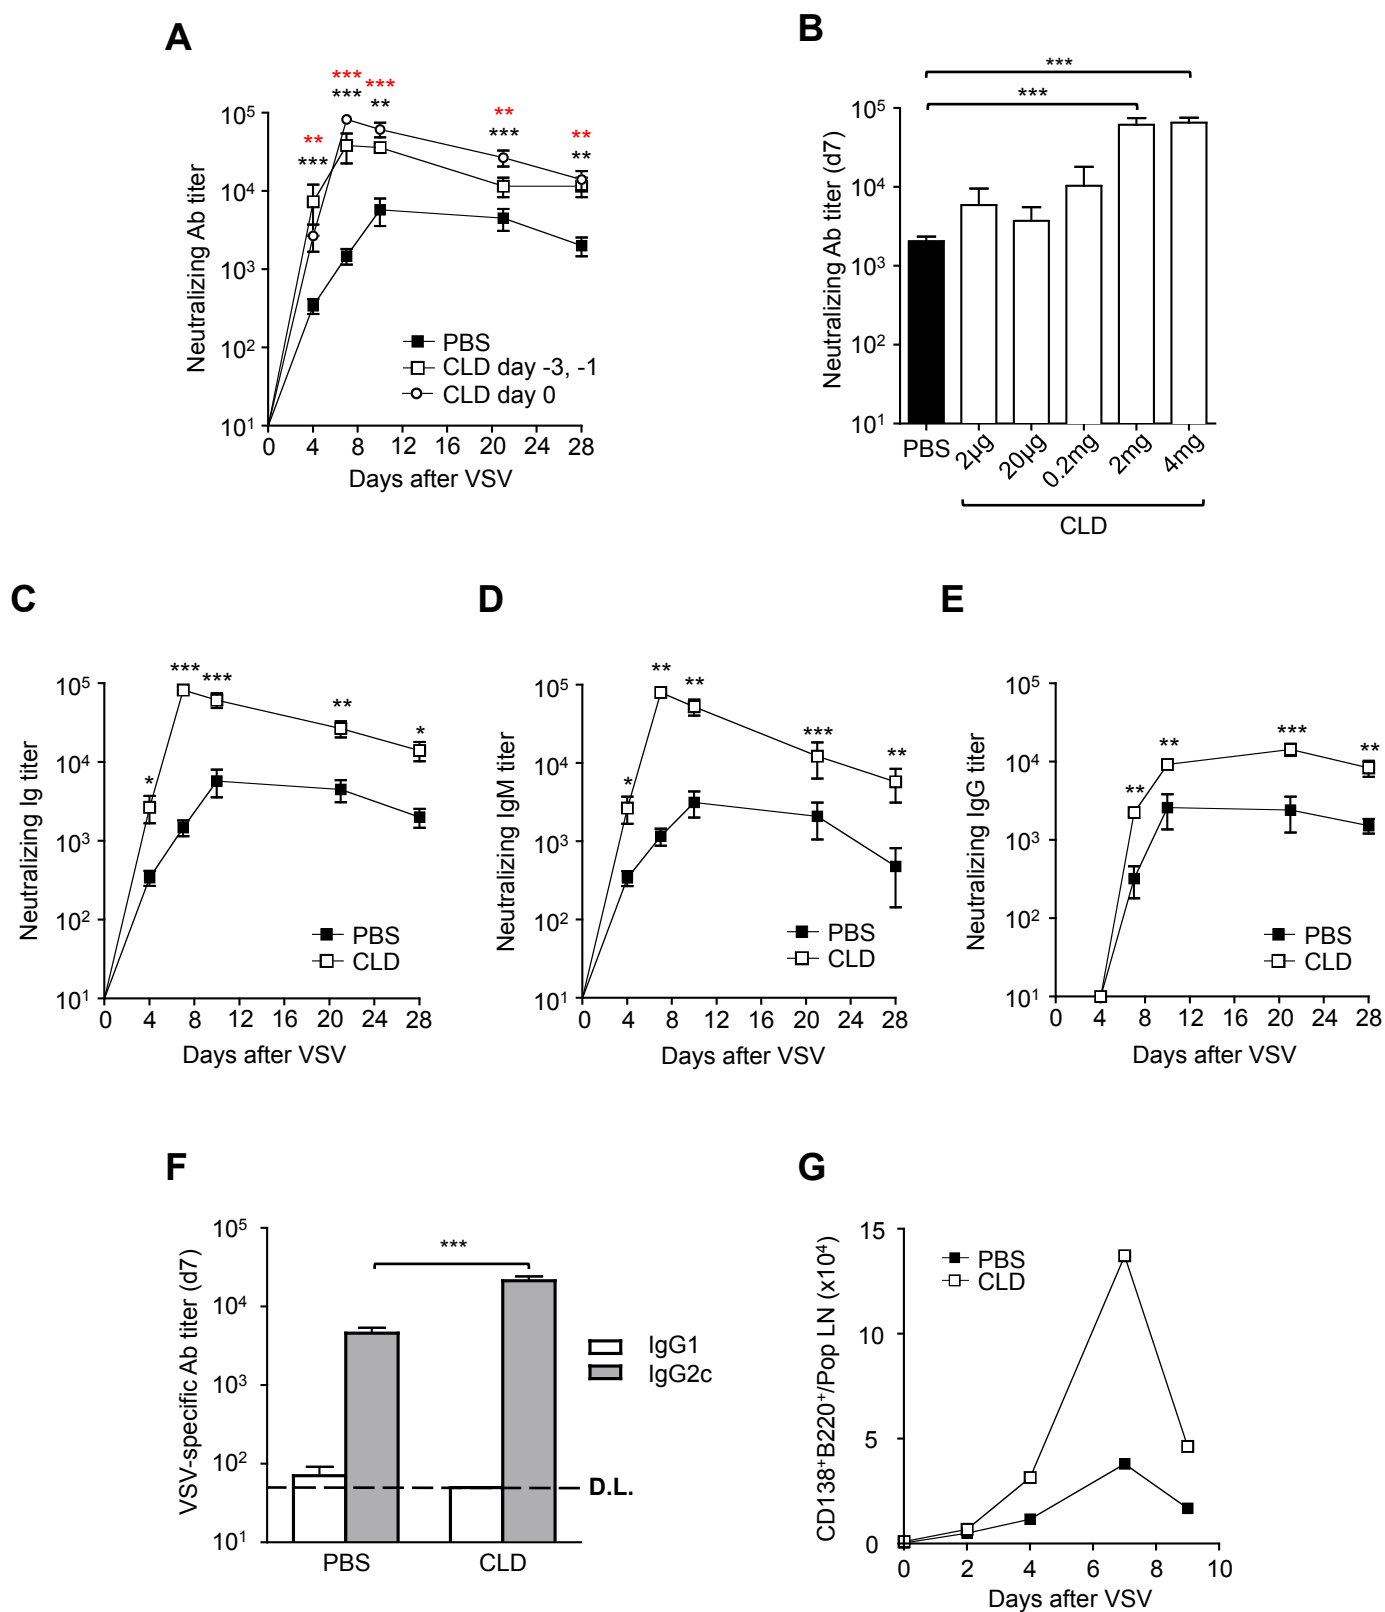

Figure S2

**A**

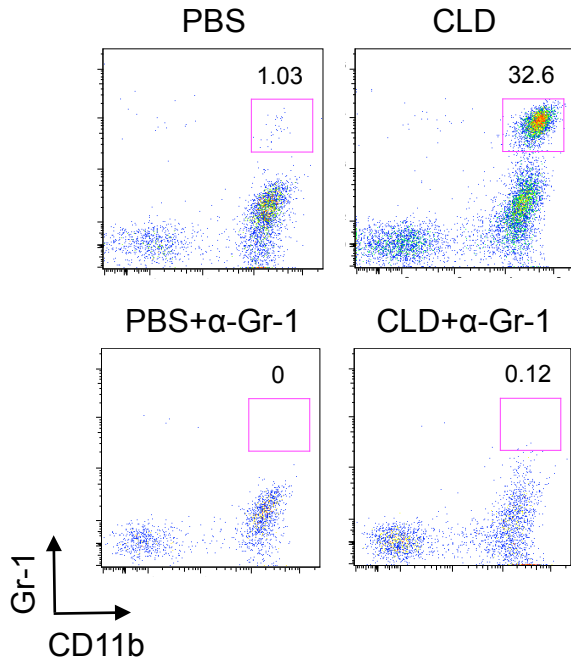

**B**

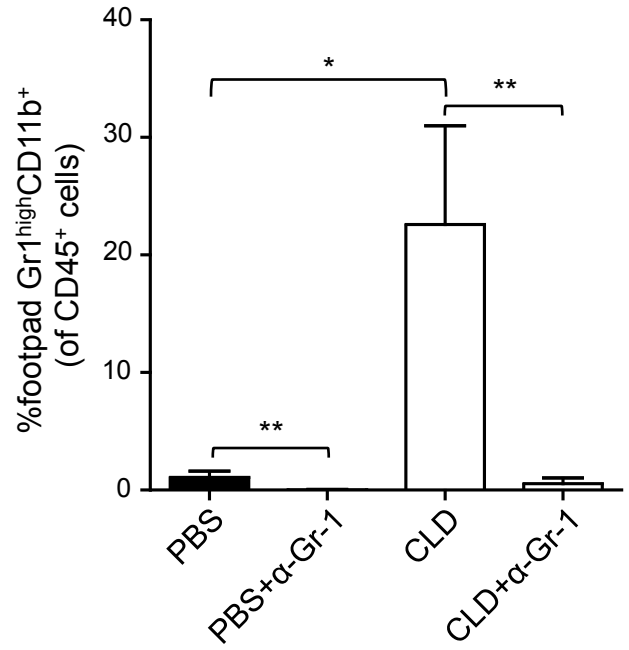

**C**

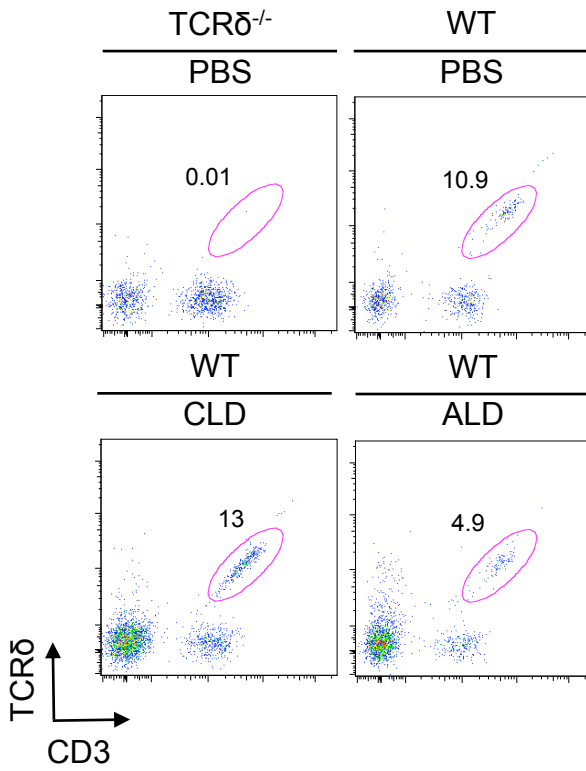

**D**

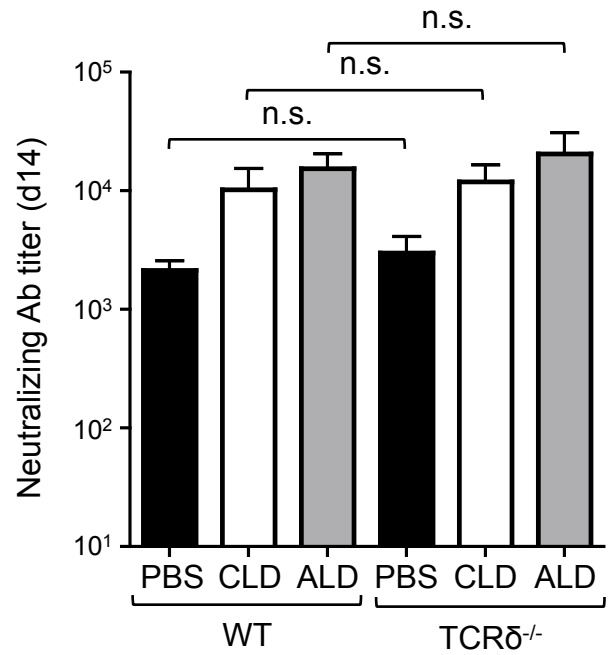

Figure S3

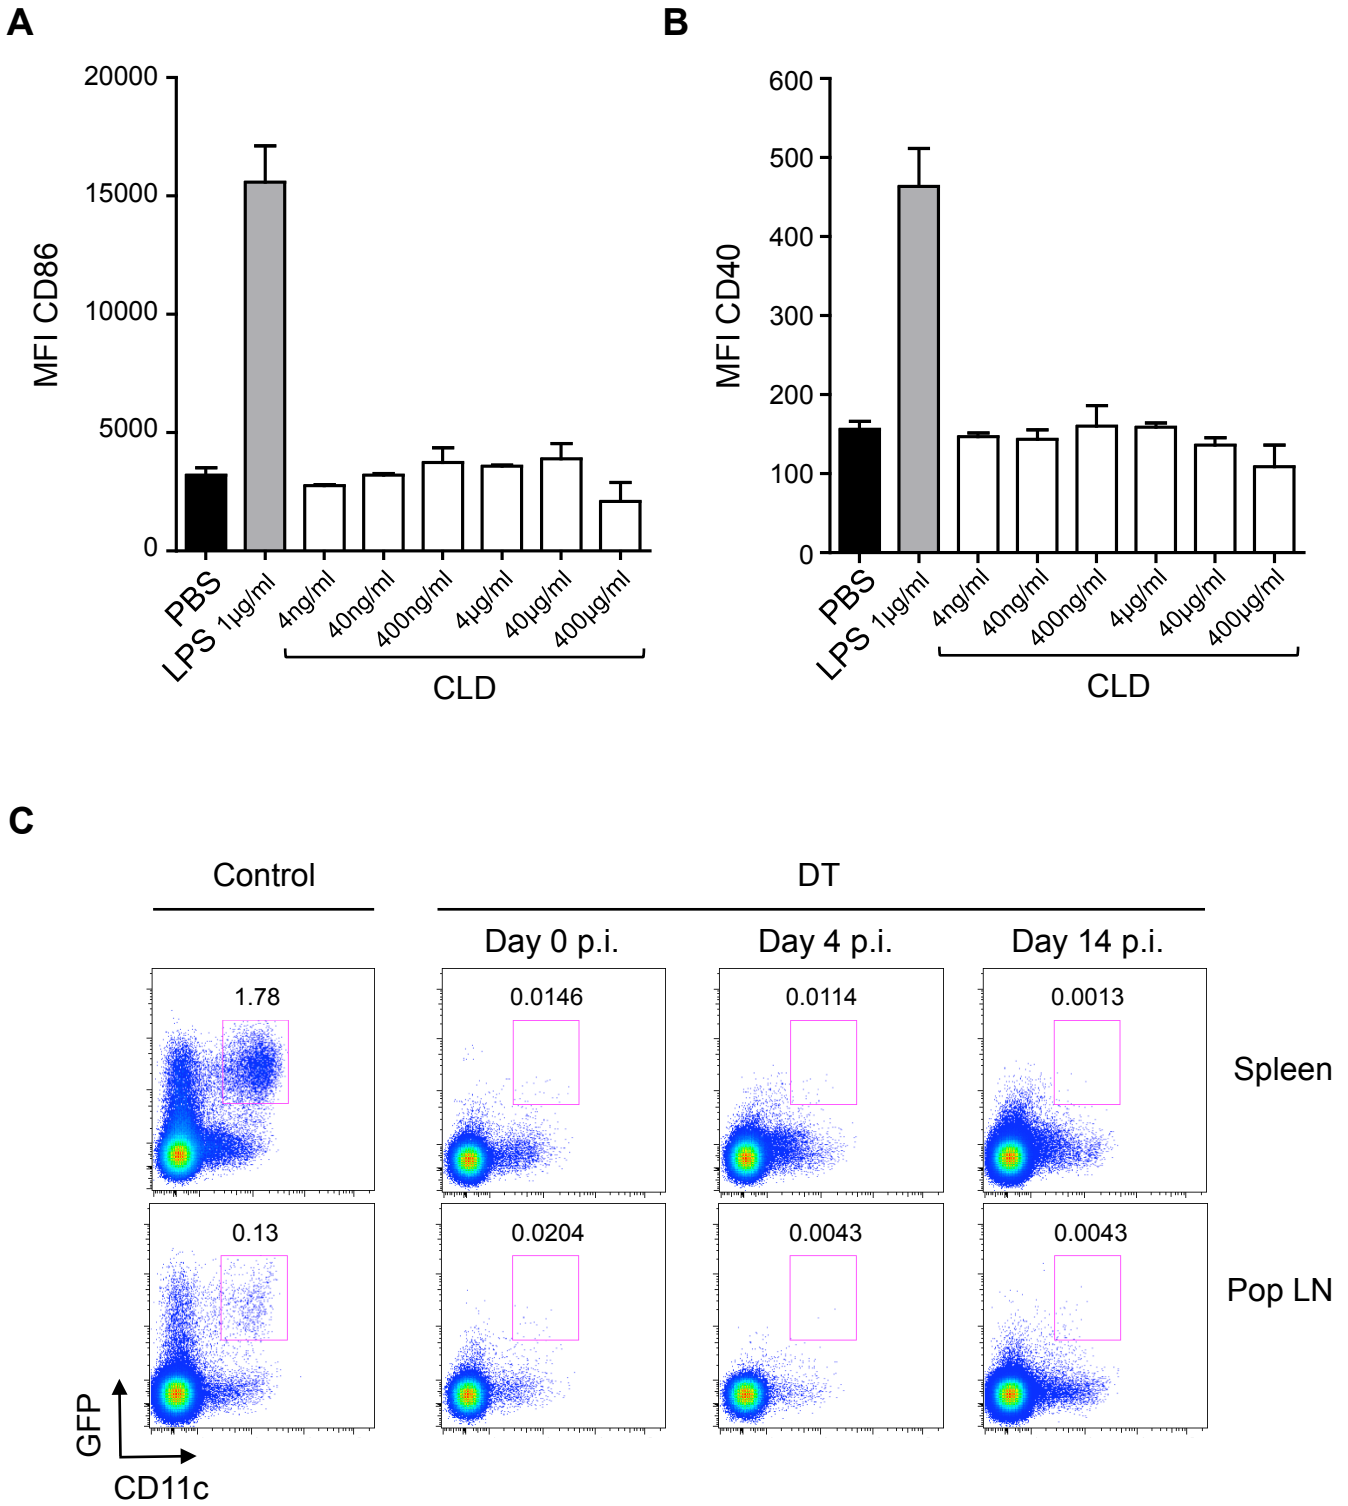

Figure S4

**A**

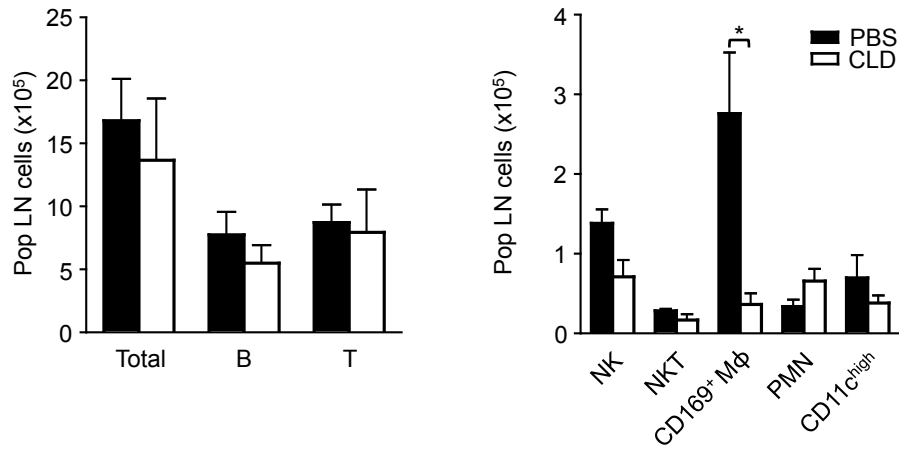

**B**

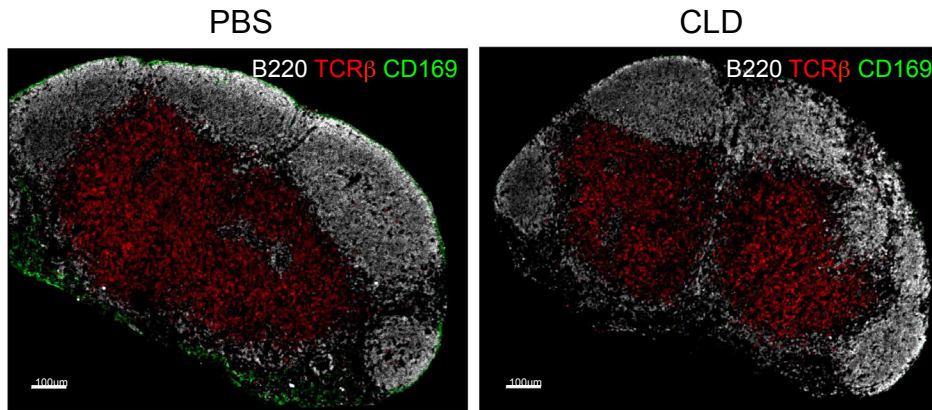

**C**

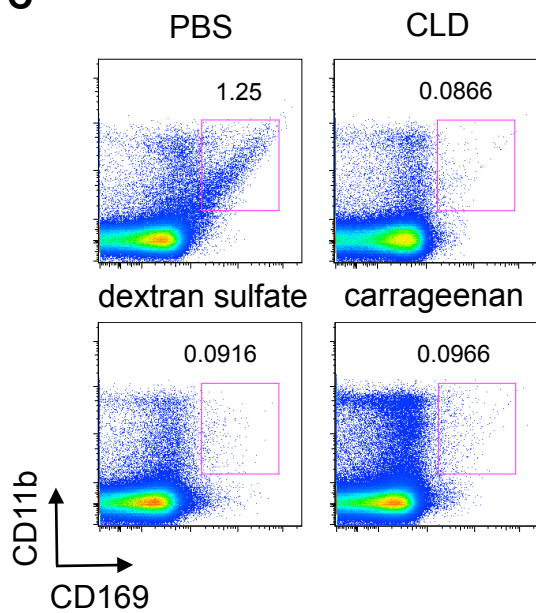

**D**

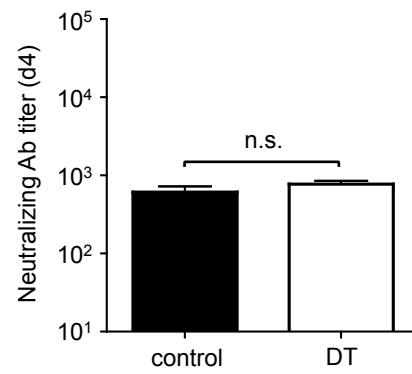

Figure S5

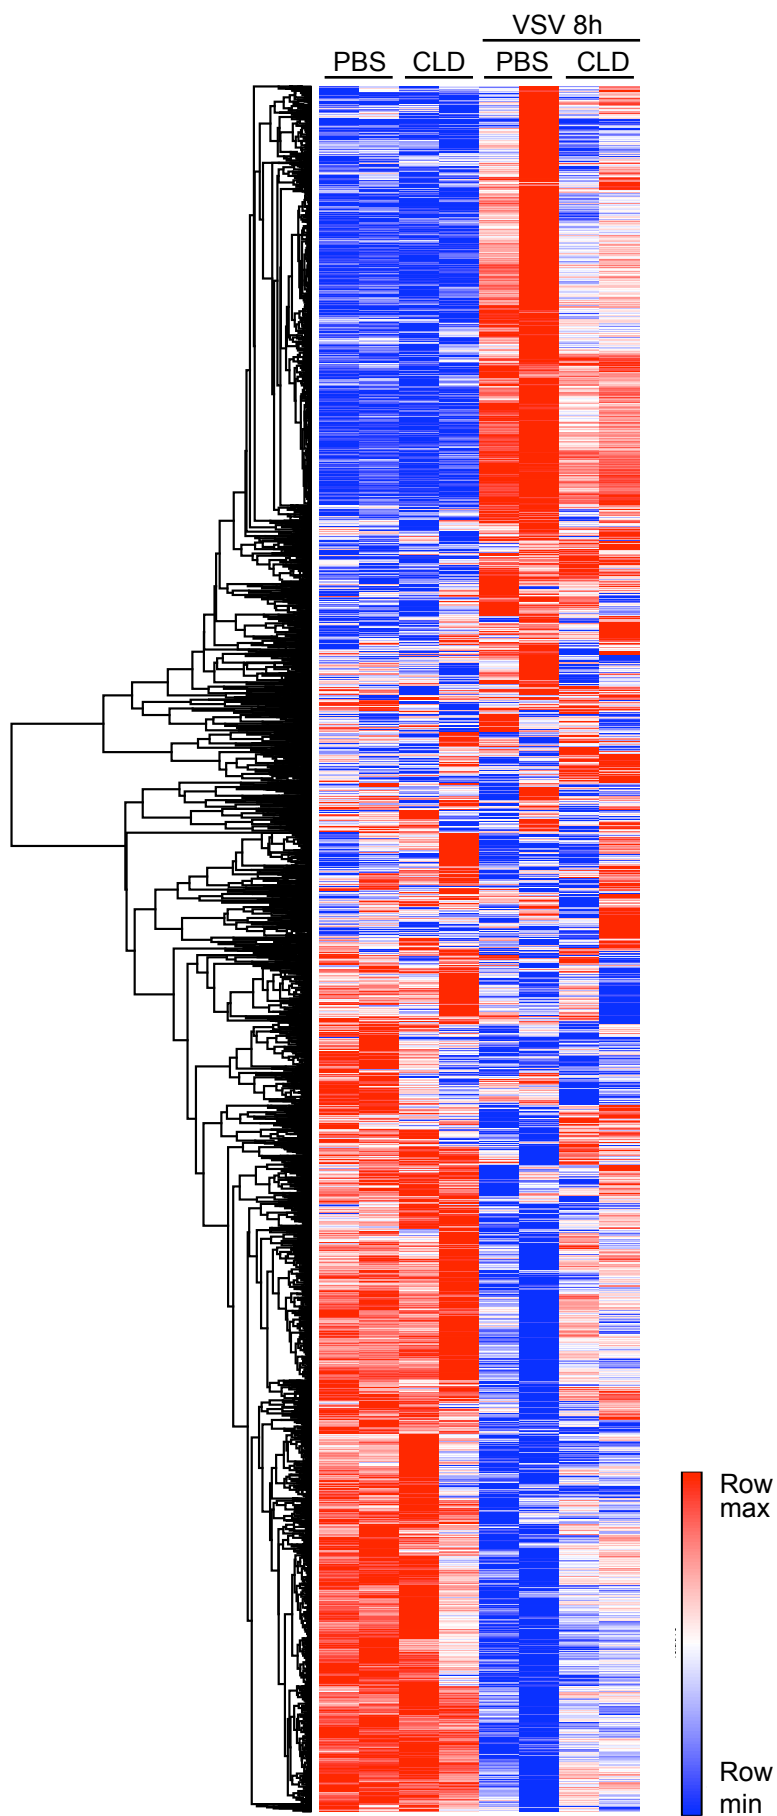

Figure S6

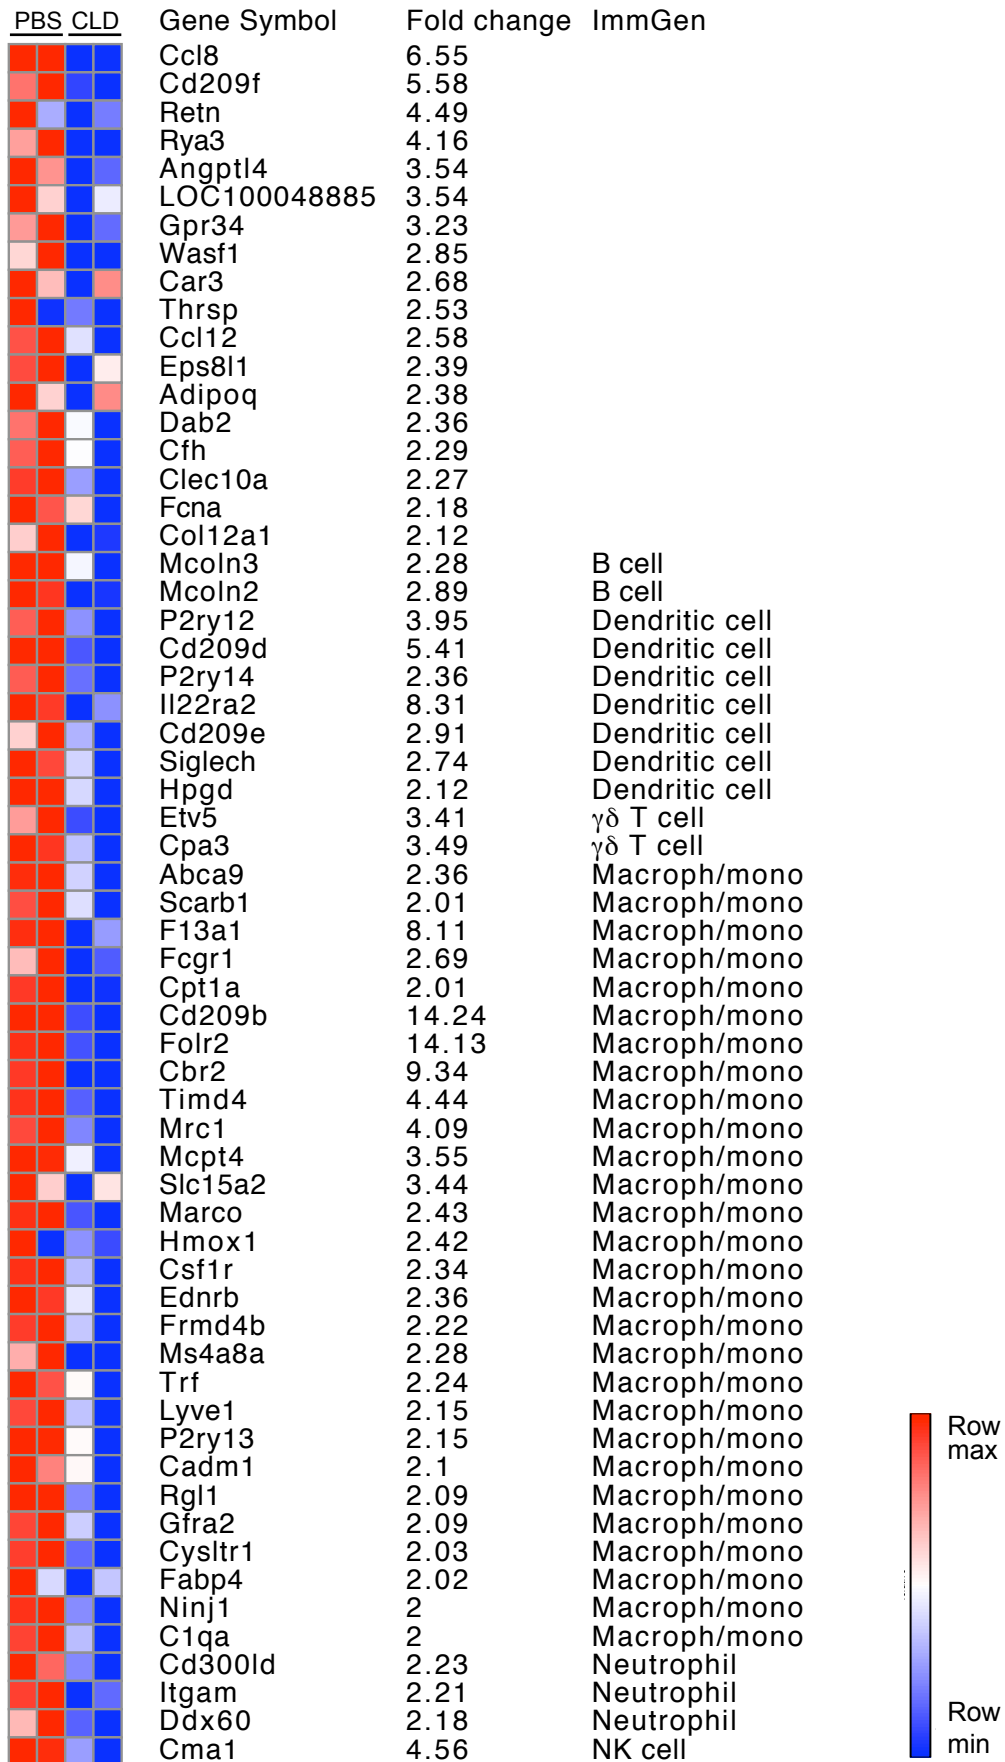

Figure S7

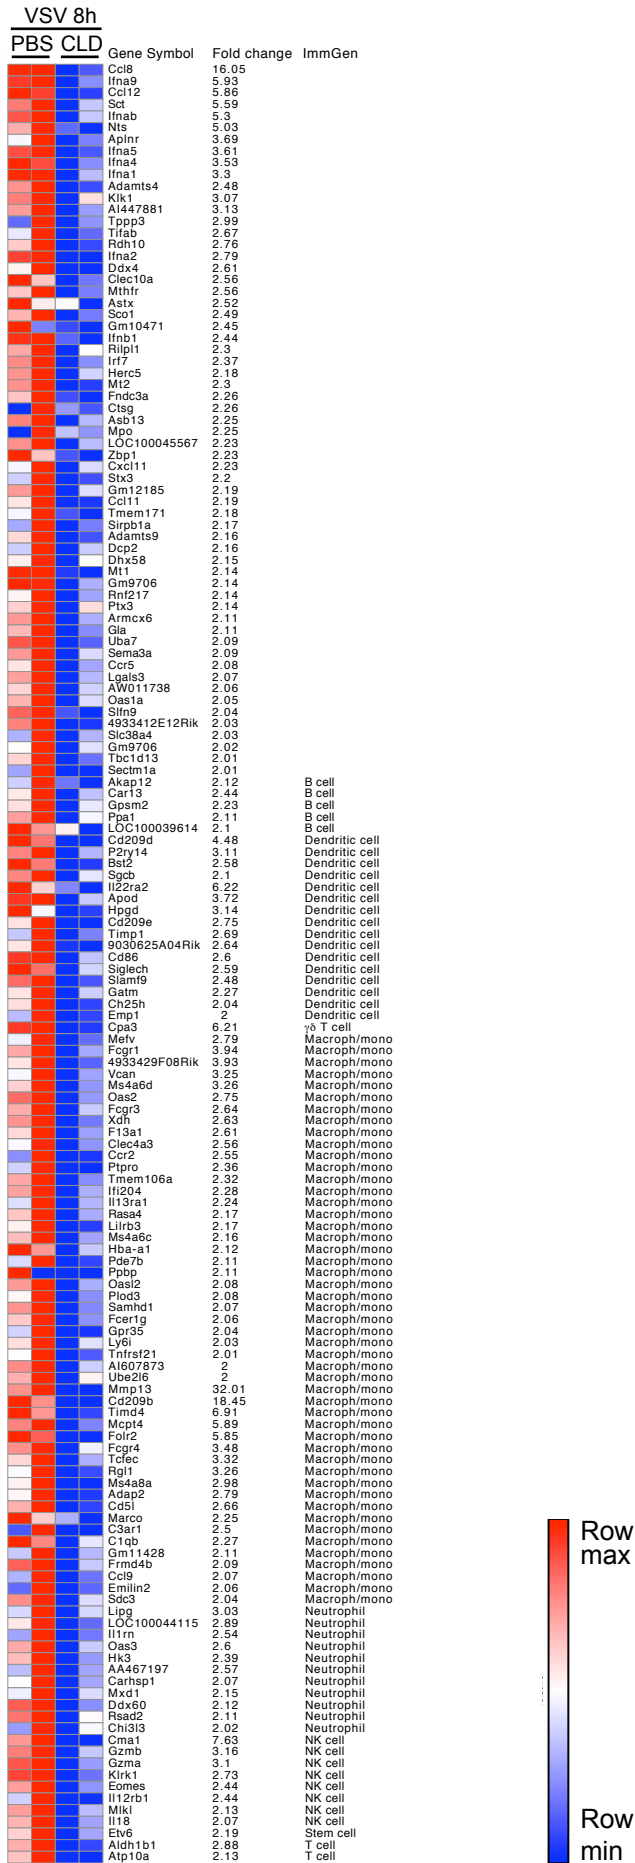

# Figure S8

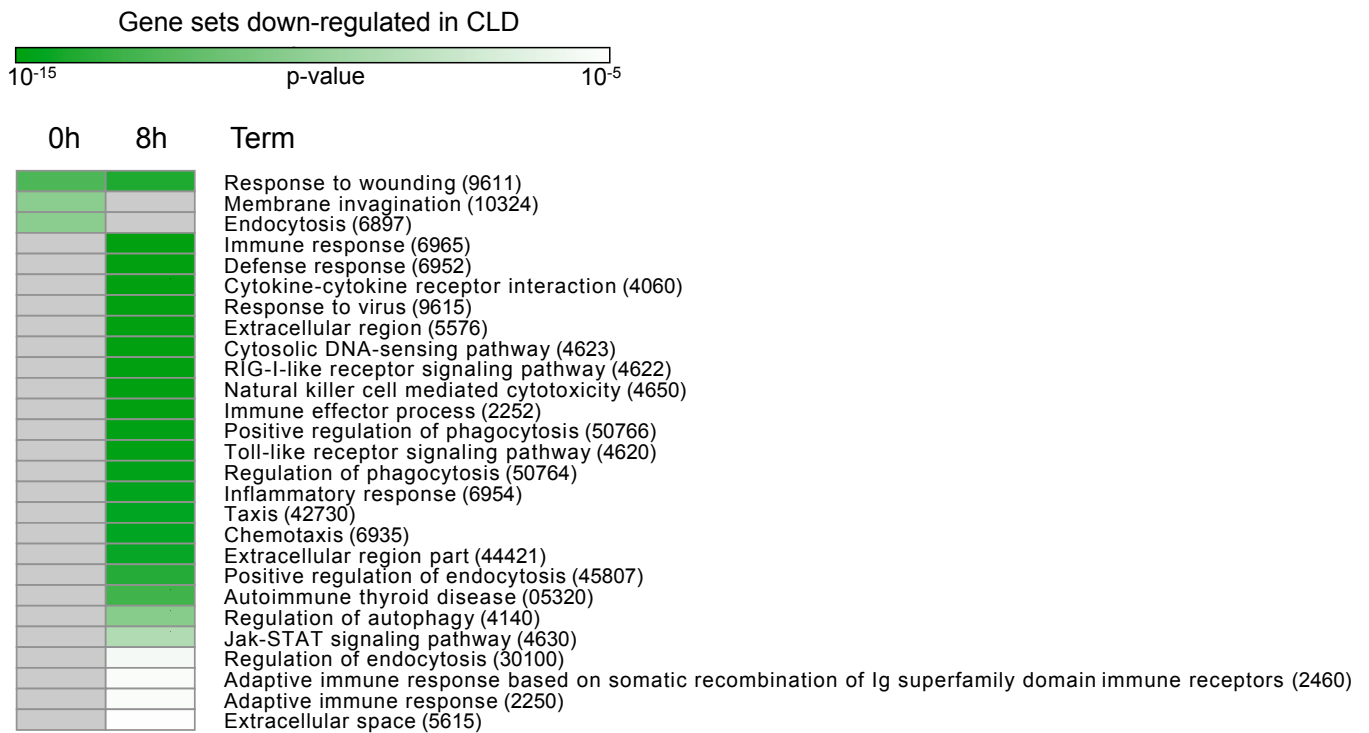



Figure S9

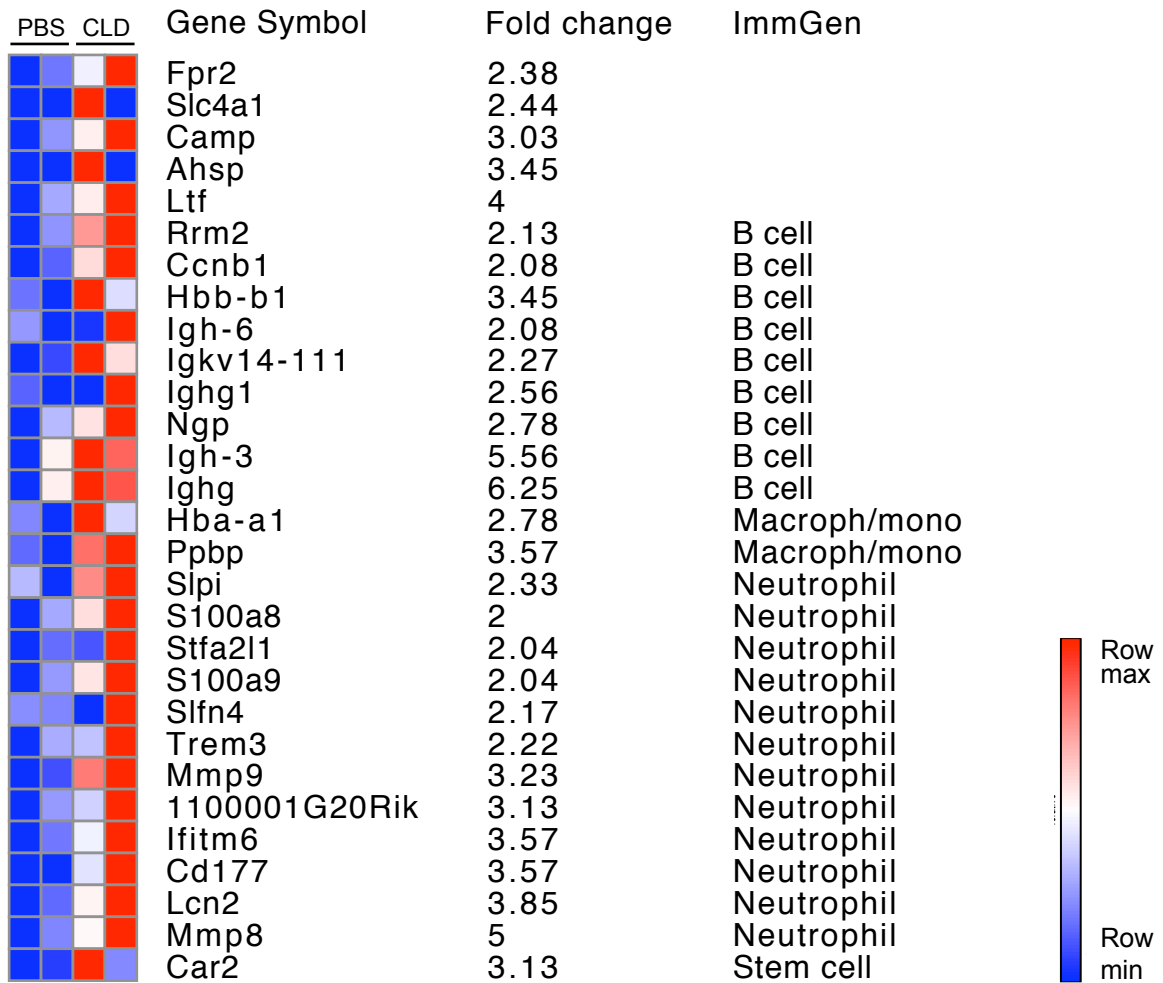

Figure S10

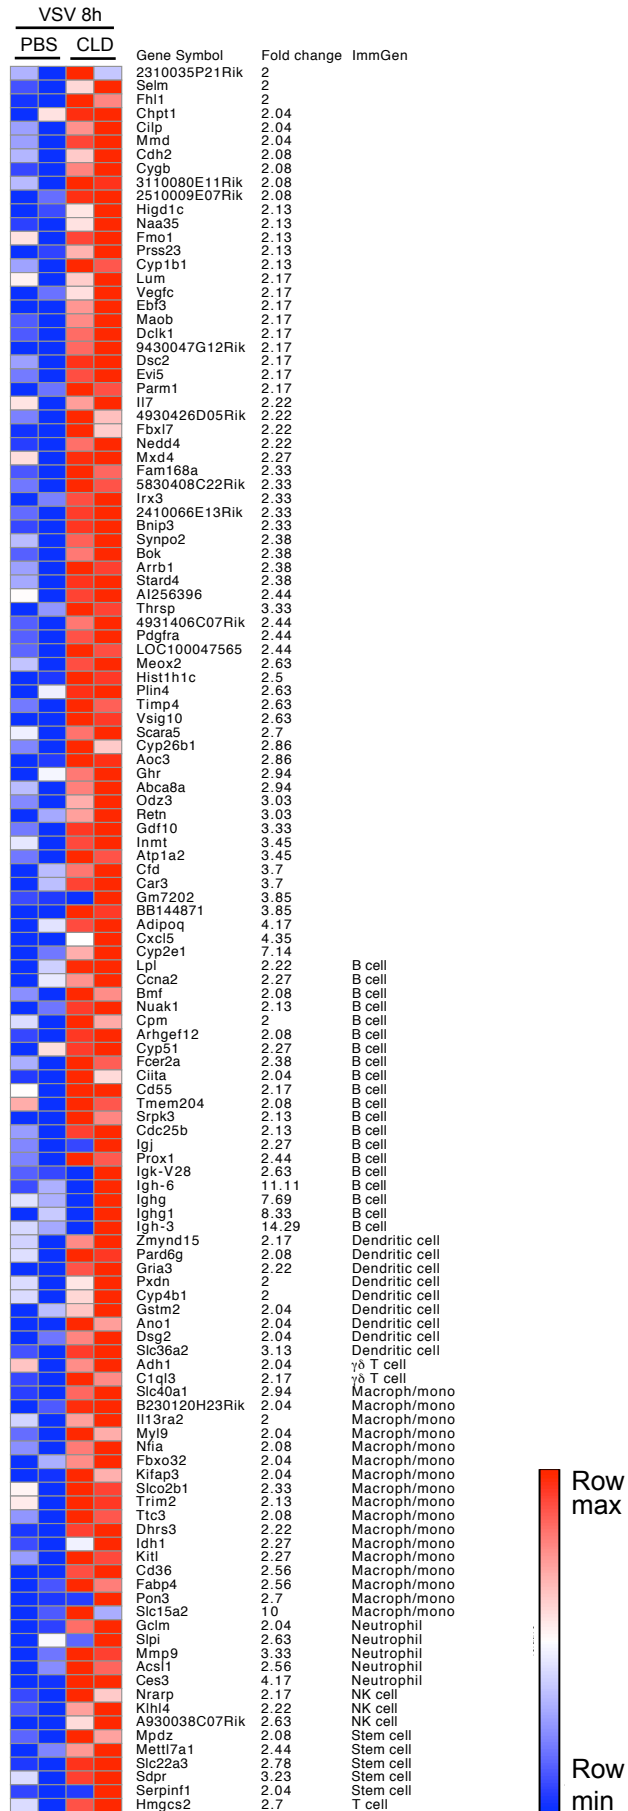

Figure S11

**A**

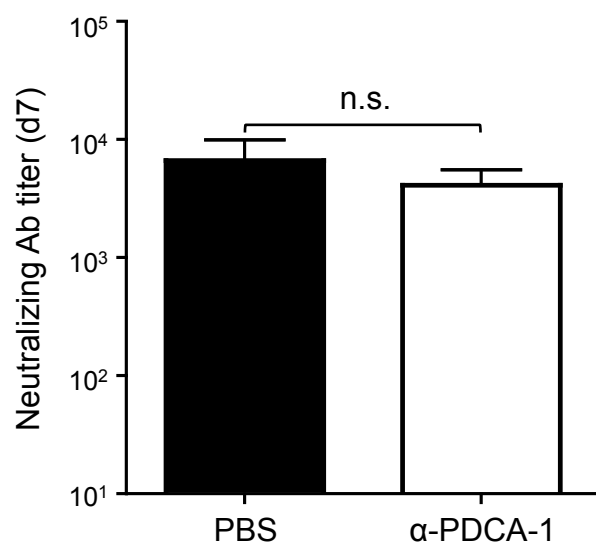

**B**

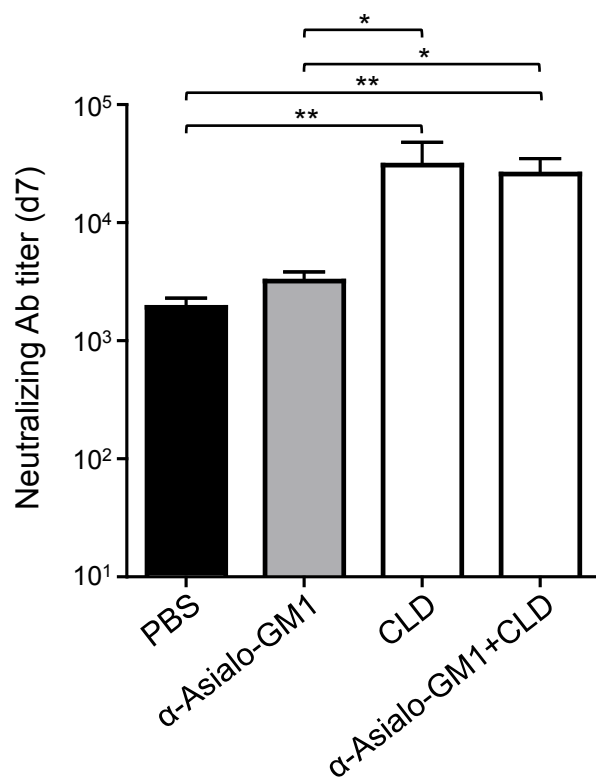

### Supplementary Figure Titles and Legends.

**Figure S1.** *Bisphosphonates Increase Antibody Responses to Live and Inactive Viruses, Proteins, Haptens and Existing Commercial Vaccine Formulations, Related to Figure 1.* (a) VSV nAb titers in the serum of C57BL/6 mice that were footpad injected with CLD 3 days and 1 day (day -3, -1) or immediately (day 0) prior to VSV infection in the same footpad.  $n = 5$  per group. Black asterisks, PBS versus CLD day -3, -1; red asterisks PBS versus CLD day 0; results are representative of 3 independent experiments. (b) VSV nAb titers 7 days p.i. in the serum of C57BL/6 mice that were footpad injected with PBS or with the indicated doses of CLD prior to VSV infection in the same footpad.  $n = 5$  per group; results are representative of 2 independent experiments. (c) VSV nAb titers in the serum of C57BL/6 mice that were footpad injected with PBS or CLD prior to infection in the same footpad with VSV.  $n = 5$  per group; results are representative of 3 independent experiments. (d) Neutralizing IgM titers in the serum of the same mice described in (a). (e) Neutralizing IgG titers of the same mice described in (a). (f) VSV-specific IgG1 and IgG2c titers 7 day p.i. in the serum of C57BL/6 mice that were footpad injected with PBS or CLD prior to VSV infection in the same footpad.  $n = 5$  per group; results are representative of 2 independent experiments. (g) Total number of CD138<sup>+</sup> cells recovered from draining popliteal lymph nodes (Pop LN) that were pooled from 3 C57BL/6 mice footpad injected with PBS or CLD prior to VSV infection in the same footpad. Results are representative of 2 independent experiments.

\*\*\*:  $P < 0.001$ ; \*\*:  $P < 0.01$ ; \*:  $P < 0.05$ ; D.L.: detection limit.

**Figure S2.** *Neutrophils and  $\gamma\delta$  T Cells Are Not Required for Bisphosphonate Adjuvant Activity, Related to Figure 2C,D.* Representative FACS plots (a) and quantification (b) of the number of Gr-1<sup>high</sup>CD11b<sup>+</sup> cells present in digested footpads from the mice described in Fig. 2c. Numbers show the percentages of CD45<sup>+</sup> cells within each gate.  $n = 4$  per group; results are representative of 2 independent experiments. (c) Representative FACS plots of digested footpads from PBS-injected TCR $\delta^{-/-}$  mice or PBS-, CLD- or alendronate (ALD)-injected C57BL/6 (WT) mice. Numbers show the percentages of CD45<sup>+</sup> cells within each gate. Results are representative of 2 independent experiments ( $n = 3$  per experiment). (d) VSV nAb titers 14 days p.i. in the serum of C57BL/6 (WT) or TCR $\delta^{-/-}$  mice that were footpad injected with PBS, CLD or ALD prior to VSV infection in the same footpad.  $n = 5$  per group; results are representative of 3 independent experiments.

\*\* :  $P < 0.01$ ; \* :  $P < 0.05$ ; n.s.: non statistically significant

**Figure S3.** *Bisphosphonate Adjuvant Activity Does Not Require Conventional Dendritic Cells (DC), Related to Figure 2E.* CD86 (a) or CD40 (b) expression on purified CD11c<sup>+</sup> DC that were cultured in the presence of 1 µg/ml LPS or with the indicated concentrations of CLD for 48 h prior to flow cytometry analysis. (c) Representative FACS plots of digested spleens or popliteal lymph nodes (Pop LN) from CD11c-GFP-DTR → C57BL/6 bone marrow chimeric mice that were left untreated (control) or injected with diphtheria toxin (DT). Numbers show the percentage of cells within each gate. Results are representative of 2 independent experiments ( $n = 3$  per experiment).

**Figure S4.** *Lymph Node Macrophage Depletion per se Does Not Increase Humoral Immune Responses, Related to Figure 2F.* (a) Cellular subset frequency in popliteal lymph nodes (Pop LN) from C57BL/6 mice that were treated with PBS or CLD.  $n = 3$  per group; results are representative of 3 independent experiments. (b) Representative confocal micrographs of Pop LN from C57BL/6 mice that were treated with PBS or CLD. Sections were stained with anti-B220 (grey), anti-TCR $\beta$  (red) and anti-CD169 (green) to identify B cells, T cells and macrophages, respectively. Scale bars represent 100 µm. Results are representative of 2 independent experiments ( $n = 3$  per experiment). (c) Representative FACS plots of digested popliteal lymph nodes from C57BL/6 mice that were treated with PBS, CLD, dextran sulfate or carrageenan. Numbers show the percentage of cells within each gate. Results are representative of 2 independent experiments ( $n = 3$  per experiment). (d) VSV nAb titers 4 days p.i. in the serum of CD11c-GFP-DTR mice that were left untreated (control) or were depleted of CD169<sup>+</sup> LN macrophages through a single footpad injection of diphtheria toxin (DT) 6 days prior to VSV infection. These mice were described in Supplementary Figure 3 from ref. (Iannacone et al., 2010).

\*:  $P < 0.05$ ; n.s.: non statistically significant

**Figure S5.** *mRNA Expression Profiles of Differentially Expressed Genes in Whole Lymph Node, Related to Figure 3A.* Shown are expression profiles for 4761 differentially expressed genes (rows) at 0 and 8 hours after VSV infection in mice treated with CLD or PBS as control (columns). Shown are genes with at least a 2-fold change in expression between treatments in both duplicate arrays (each column corresponds to a replicate). Values from multiple probe sets targeting the same gene were collapsed and gene-expression profiles were hierarchically clustered.

**Figure S6.** *mRNA Expression Profiles of Genes Decreased upon CLD Treatment in Whole Lymph Node Before Infection, Related to Fig. 3A.* Shown are expression profiles for 62 differentially expressed genes (rows) with at least a 2-fold decrease in expression in CLD-treated mice compared to controls

(PBS). The right-most column indicates the cell types in which each gene is specifically expressed based on the Immunological Genome (ImmGen) database.

**Figure S7.** *mRNA Expression Profiles of Genes Decreased upon CLD Treatment in Whole Lymph Node After Infection, Related to Figure 3A.* Shown are expression profiles for 155 differentially expressed genes (rows) with at least a 2-fold decrease in expression in CLD-treated mice compared to controls (PBS) at 8 hours after VSV infection. The right-most column indicates the cell types in which each gene is specifically expressed based on the Immunological Genome (ImmGen) database.

**Figure S8.** *Gene Enrichment Analysis of CLD-Dependent Genes from Microarray Measurements of Whole Lymph Node, Related to Figure 3A.* Shown are the Gene Ontology (GO) terms and canonical pathways (KEGG database) (rows) statistically enriched among the 217 genes with at least a 2-fold decrease in expression at 0 and 8 hours (columns) after VSV infection in CLD-treated mice compared to control (PBS). Enriched GO term categories include BP: biological process, and CC: cellular component. Green: p value <  $10^{-15}$ ; white: p value <  $10^{-4}$ ; grey: no enrichment.

**Figure S9.** *mRNA Expression Profiles of Genes Increased upon CLD Treatment in Whole Lymph Node Before Infection, Related to Figure 3A.* Shown are expression profiles for 29 differentially expressed genes (rows) with at least a 2-fold increase in expression in CLD-treated mice compared to controls (PBS). The right-most column indicates the cell types in which each gene is specifically expressed based on the Immunological Genome (ImmGen) database.

**Figure S10.** *mRNA Expression Profiles of Genes Increased upon CLD Treatment in Whole Lymph Node After Infection, Related to Figure 3A.* Shown are expression profiles for 127 differentially expressed genes (rows) with at least a 2-fold increase in expression in CLD-treated mice compared to controls (PBS) at 8 hours after VSV infection. The right-most column indicates the cell types in which each gene is specifically expressed based on the Immunological Genome (ImmGen) database.

**Figure S11.** *CLD Increases Ab Responses Independently of pDCs or NK Cells, Related to Figure 3A.* (a) VSV nAb titers 7 days p.i. in the serum of C57BL/6 mice that received PBS or were depleted of pDCs via anti-PDCA-1 ( $\alpha$ -PDCA1) injection 24 hours prior to VSV infection. These mice were described in Fig. 3j and Suppl. Fig. 8b from ref. (Iannacone et al., 2010). (b) VSV nAb titers 7 days p.i. in the serum of C57BL/6 mice that were injected (or not) with anti-Asialo-GM1 depleting Ab ( $\alpha$ -Asialo-GM1, see Methods for details) and were subsequently footpad injected with PBS or CLD immediately

prior to VSV infection in the same footpad.  $n = 5$ ; results are representative of 2 independent experiments.

\*\* $: P < 0.01$ ; \* $: P < 0.05$ ; n.s.: non statistically significant

## Supplementary Table 1 Title and Legend.

**Table S1.** *List of Genes Differentially Regulated upon CLD Treatment, Related to Figure 3A.* List of 6869 probe sets with expression values > 40 after RMA normalization. Shown are normalized data for duplicate microarrays on whole popliteal lymph node from mice treated with PBS or CLD before (0h) and 8h after VSV infection.



**Table S2.** Characteristics (Treatment, Gender, Age and Diagnosis) of Patients with Osteoporosis or Paget's Disease of Bone That Were Treated with Neridronate or Zoledronate, Related to Figure 3I,J.

| <b>TREATMENT</b>   | <b>GENDER</b> | <b>AGE</b> | <b>DIAGNOSIS</b>        |
|--------------------|---------------|------------|-------------------------|
| Neridronate 200 mg | Female        | 52         | Paget's disease of bone |
| Neridronate 200 mg | Female        | 56         | Paget's disease of bone |
| Neridronate 200 mg | Female        | 67         | Paget's disease of bone |
| Neridronate 200 mg | Female        | 68         | Paget's disease of bone |
| Neridronate 200 mg | Female        | 73         | Paget's disease of bone |
| Neridronate 200 mg | Male          | 54         | Paget's disease of bone |
| Neridronate 200 mg | Male          | 55         | Paget's disease of bone |
| Neridronate 200 mg | Male          | 56         | Paget's disease of bone |
| Neridronate 200 mg | Male          | 64         | Paget's disease of bone |
| Neridronate 200 mg | Male          | 68         | Paget's disease of bone |
| Neridronate 200 mg | Male          | 77         | Paget's disease of bone |
| Zoledronate 5mg    | Female        | 56         | Osteoporosis            |
| Zoledronate 5mg    | Female        | 68         | Osteoporosis            |
| Zoledronate 5mg    | Female        | 70         | Osteoporosis            |
| Zoledronate 5mg    | Female        | 76         | Osteoporosis            |
| Zoledronate 5mg    | Female        | 76         | Osteoporosis            |
| Zoledronate 5mg    | Female        | 78         | Osteoporosis            |
| Zoledronate 5mg    | Male          | 53         | Paget's disease of bone |
| Zoledronate 5mg    | Male          | 61         | Paget's disease of bone |
| Zoledronate 5mg    | Male          | 72         | Paget's disease of bone |
